# Supplementary material
Source: Springer Nature journal article supplement (https://www.springermedizin.de/resource/supplementary/13069_2008_5_MOESM12_ESM.pdf/9659588)

aetiological agent

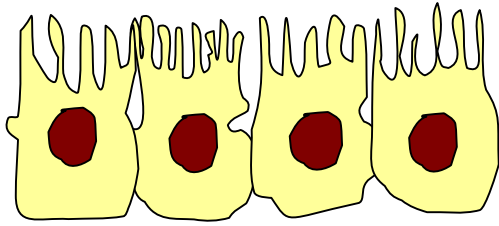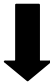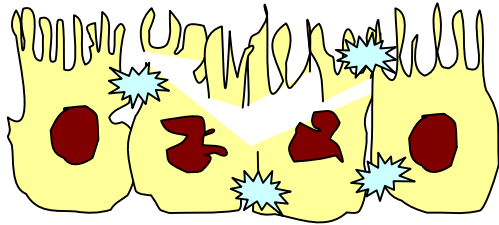

1

parenchymal damage

± endothelial damage

inflammatory infiltrate

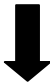

2

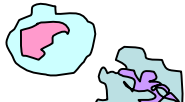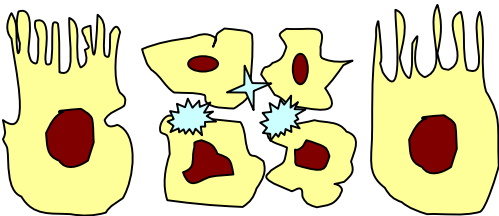

3

phagocytosis,  
release of GFs, CKs ROS

4

a) recruitment of ECM  
producing cells  
b) ± EC precursors

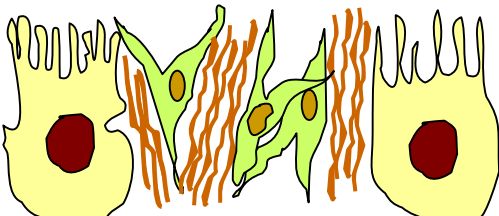

5

fibrillar ECM degradation  
and BM-like deposition

6

apoptosis of ECM  
producing cells

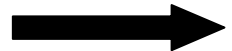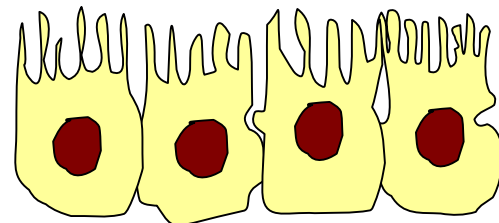

8

**RESTITUTIO AD  
INTEGRUM**

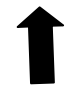

7

parenchymal cells:  
compensatory hyperplasia  
also by GF released by IC  
and ECM cells

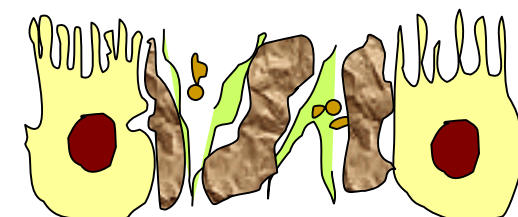

Supplement: MOESM12 [file 9659588]
